# Supplementary material for: Proteomics Characterization of Cytoplasmic and Lipid-Associated Membrane Proteins of Human Pathogen Mycoplasma fermentans M64
Source: PubMed Central journal article supplement (PMC3335035; doi:10.1371/journal.pone.0035304), 2012-04-20

Figure 2A

INFORMATION STORAGE AND PROCESSING

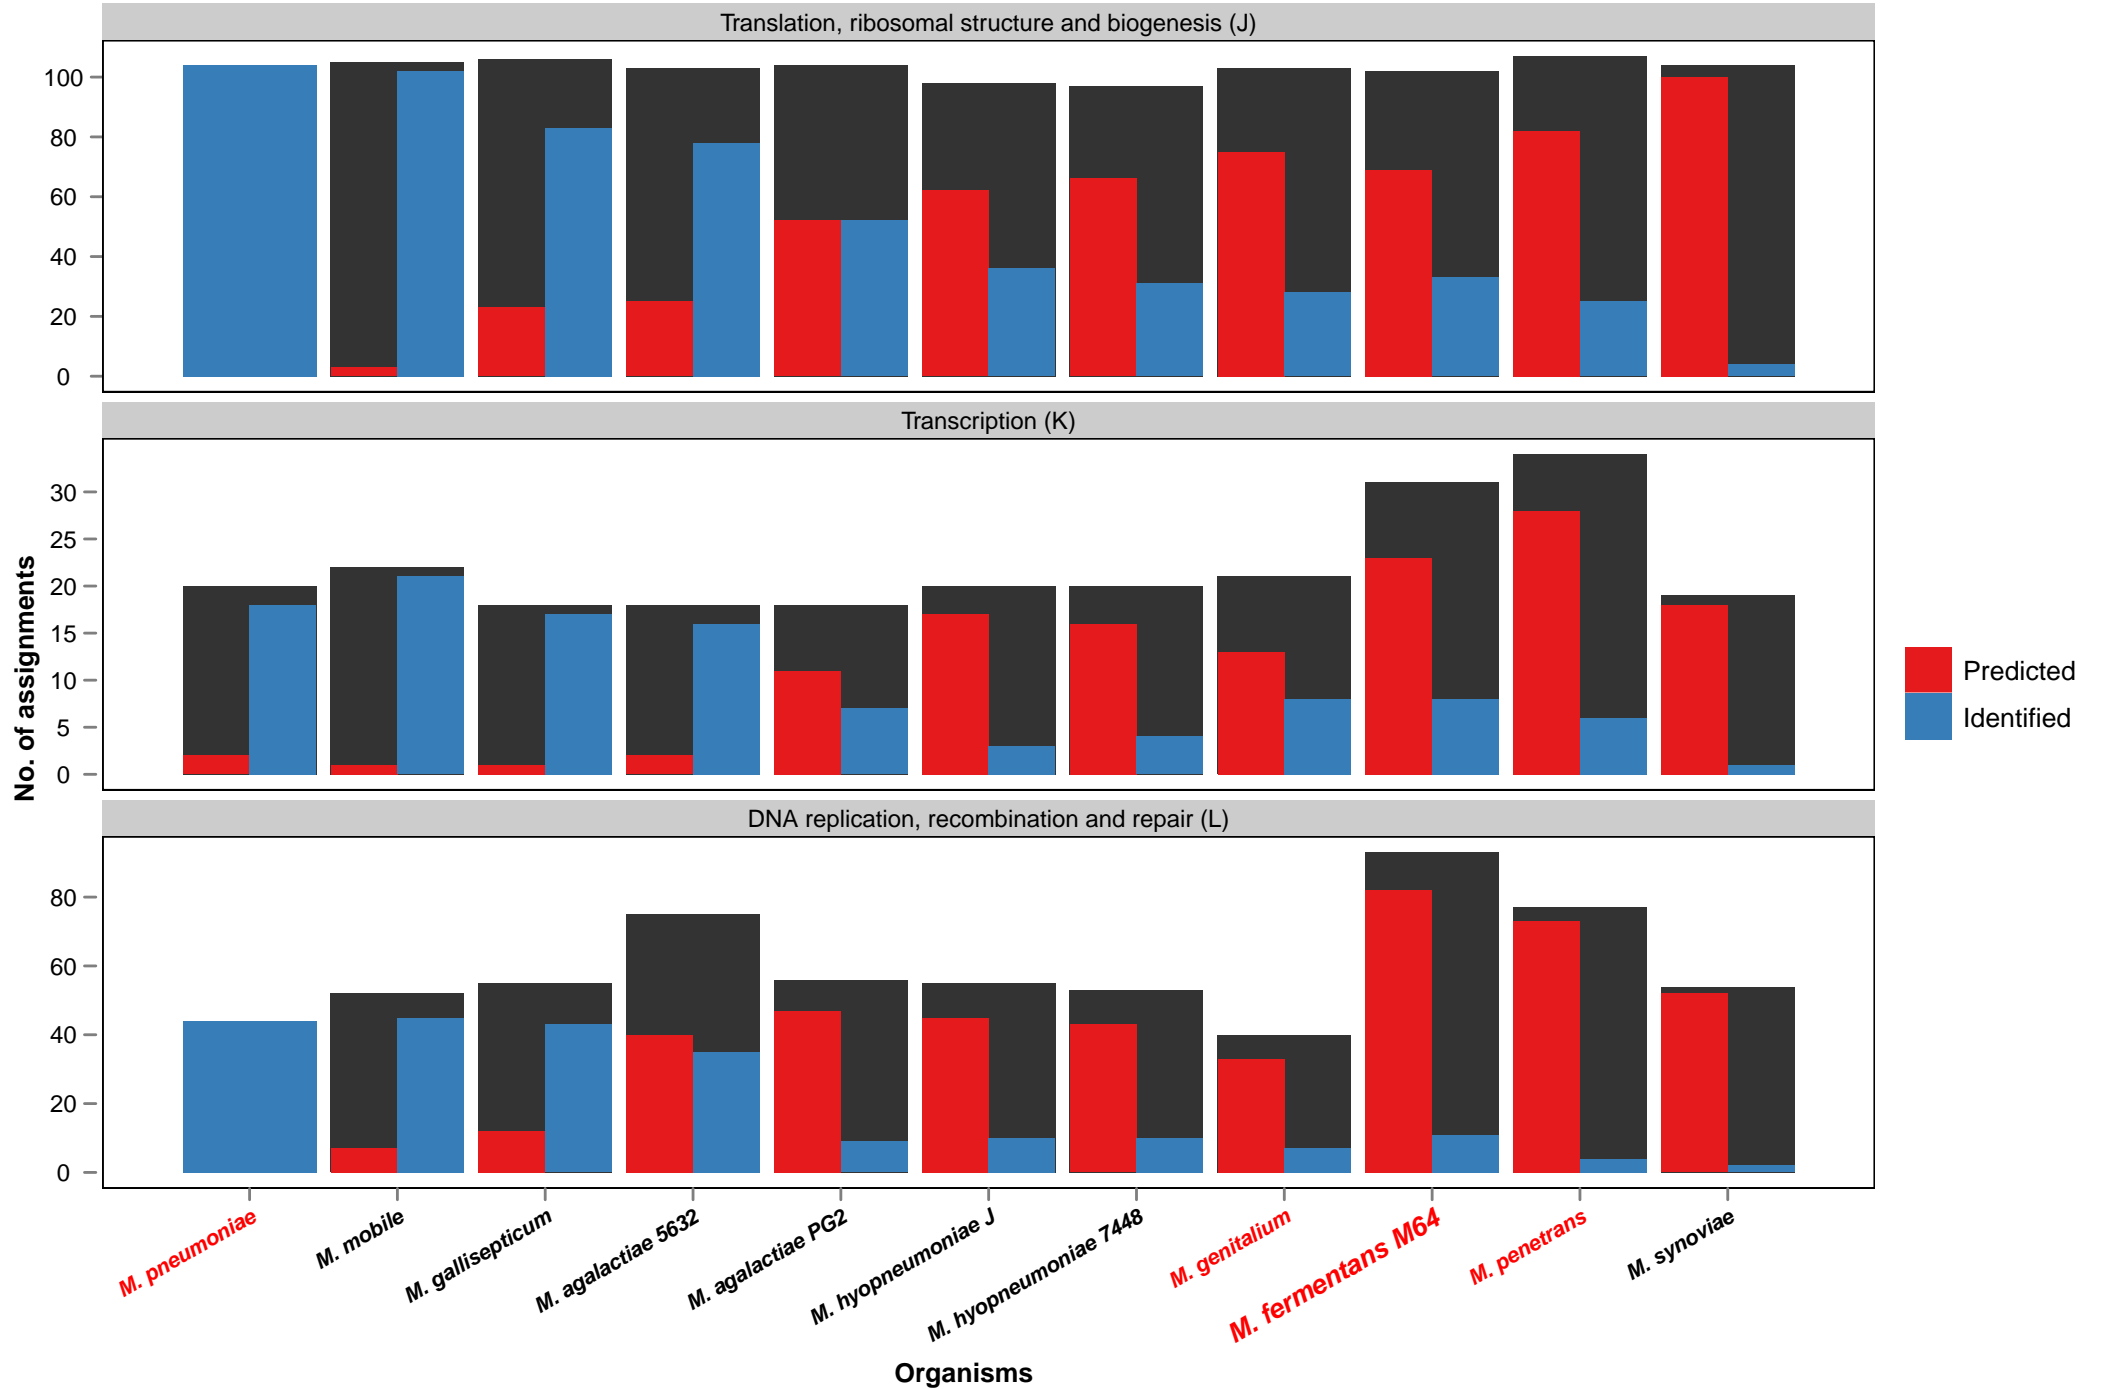

Figure 2B

CELLULAR PROCESSES (1)

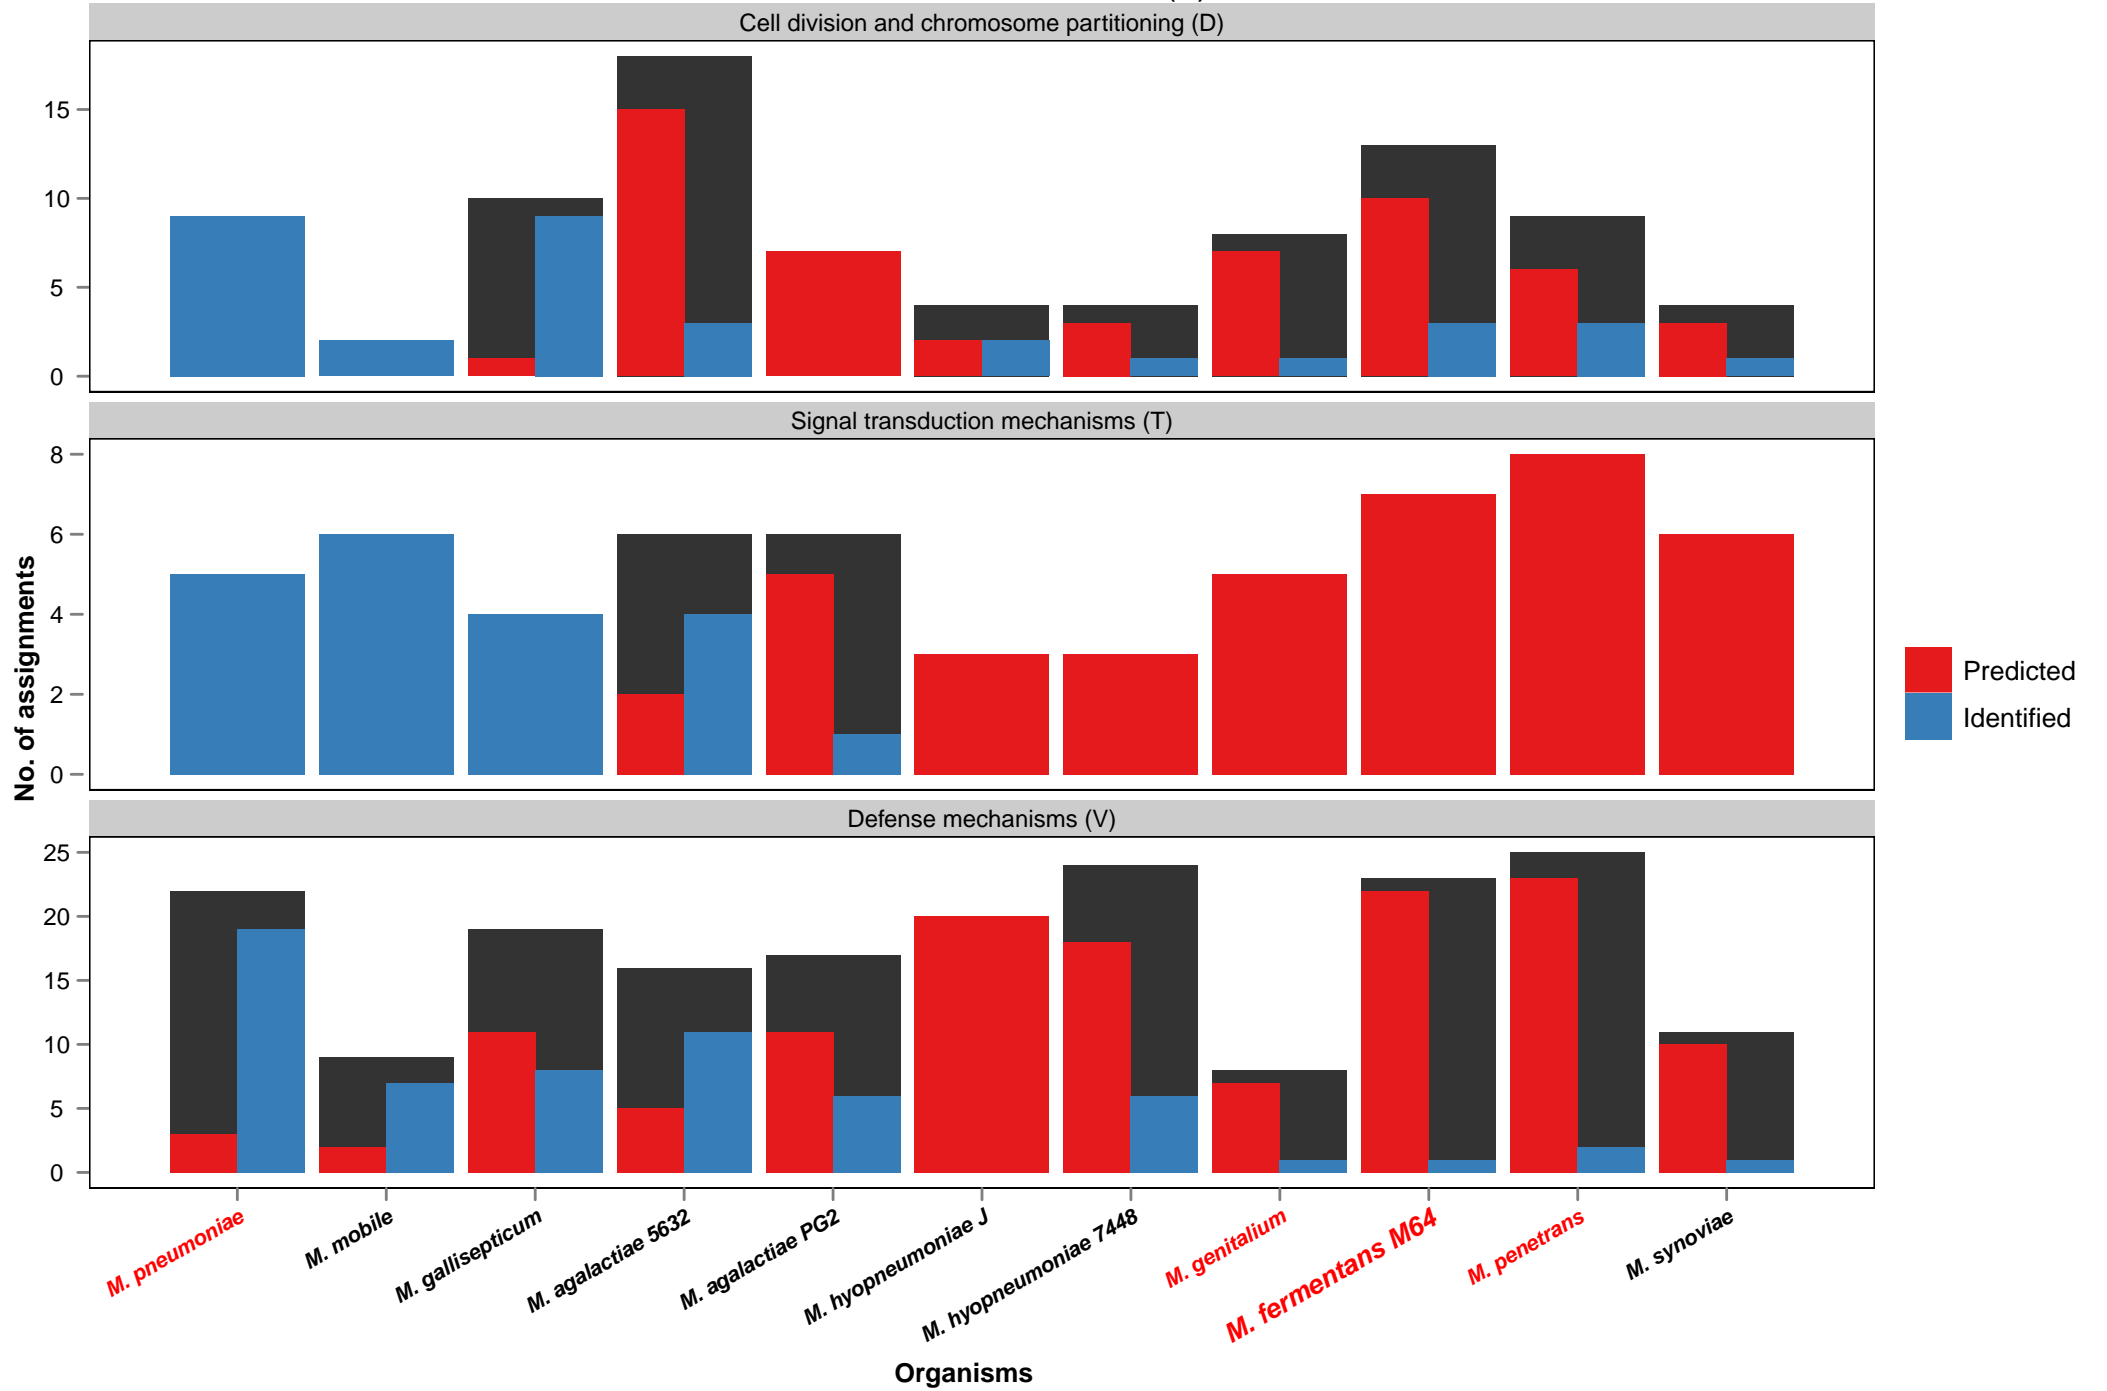

Figure 2C

CELLULAR PROCESSES (2)

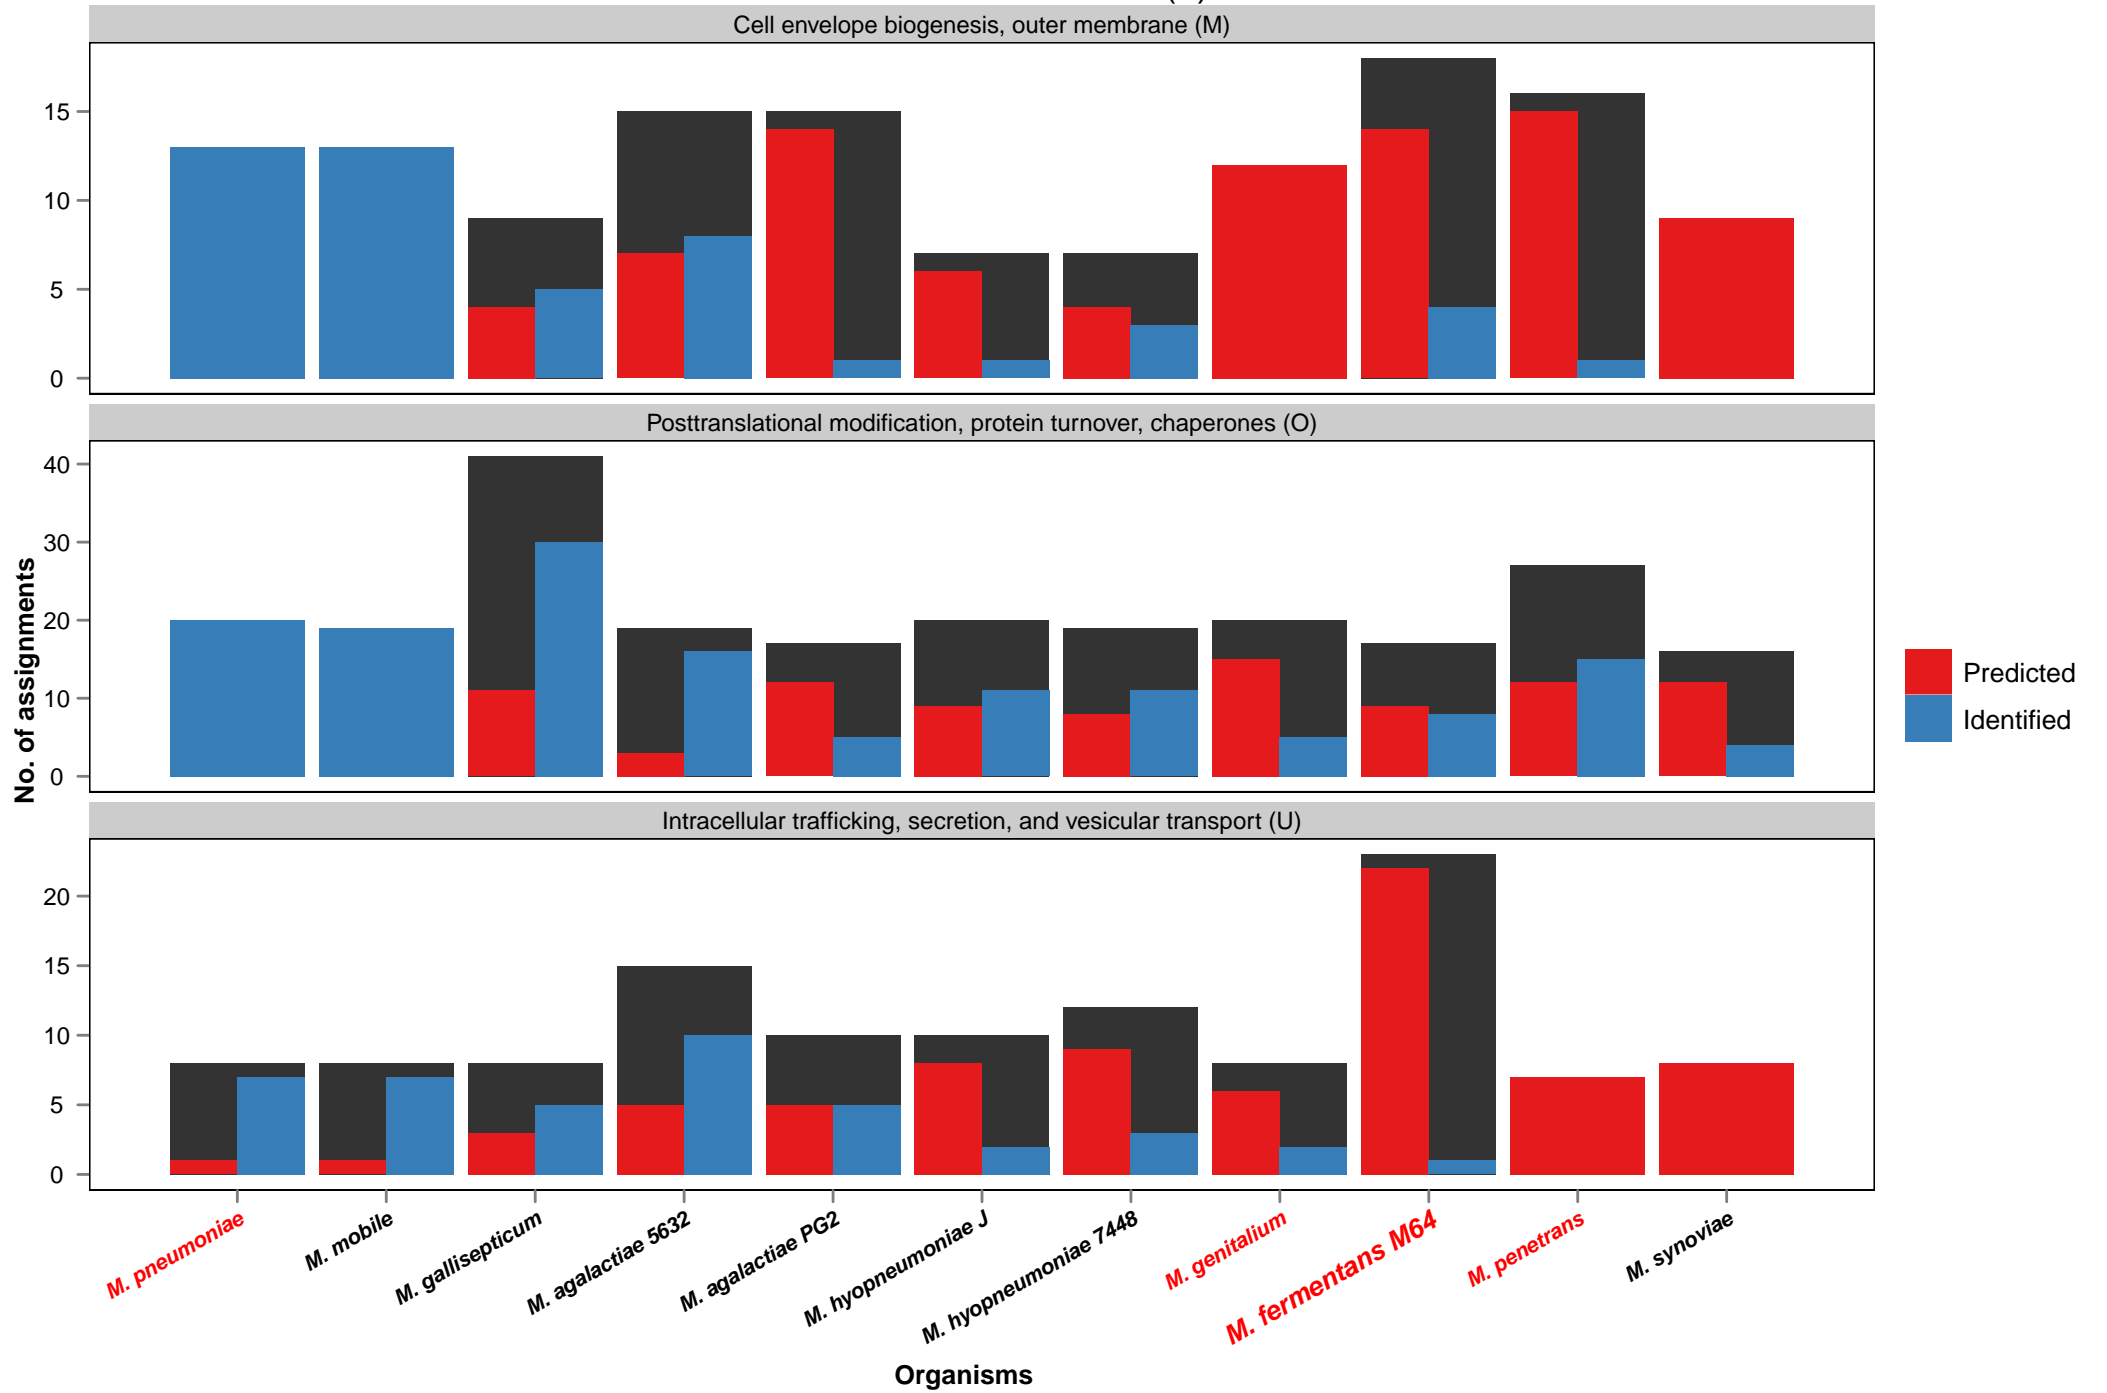

Figure 2D

METABOLISM (1)

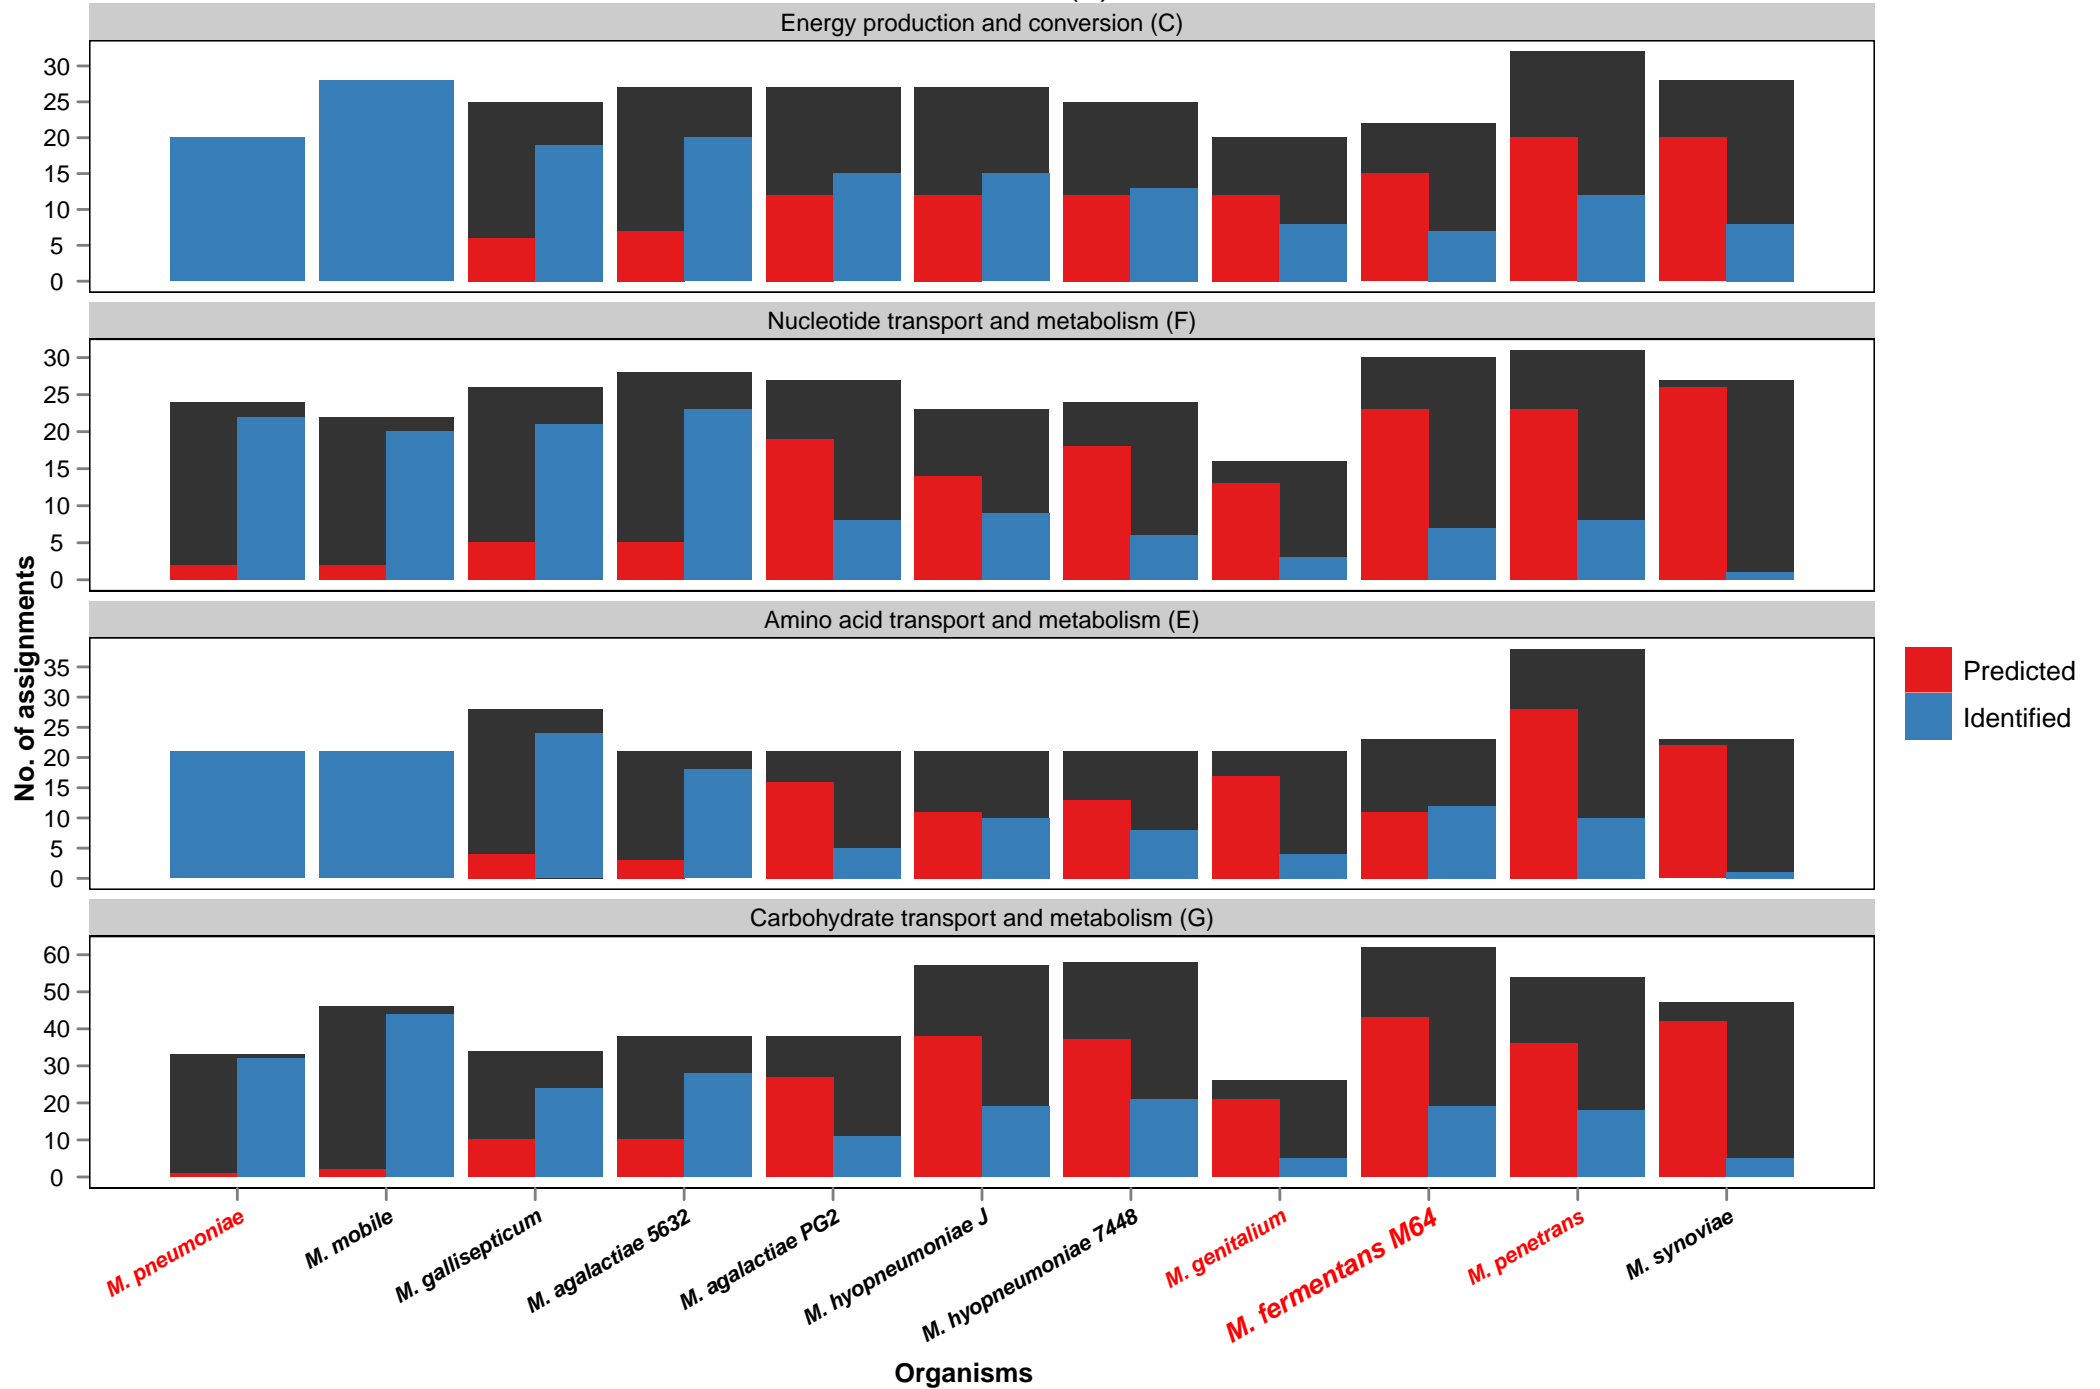

Figure 2E

METABOLISM (2)

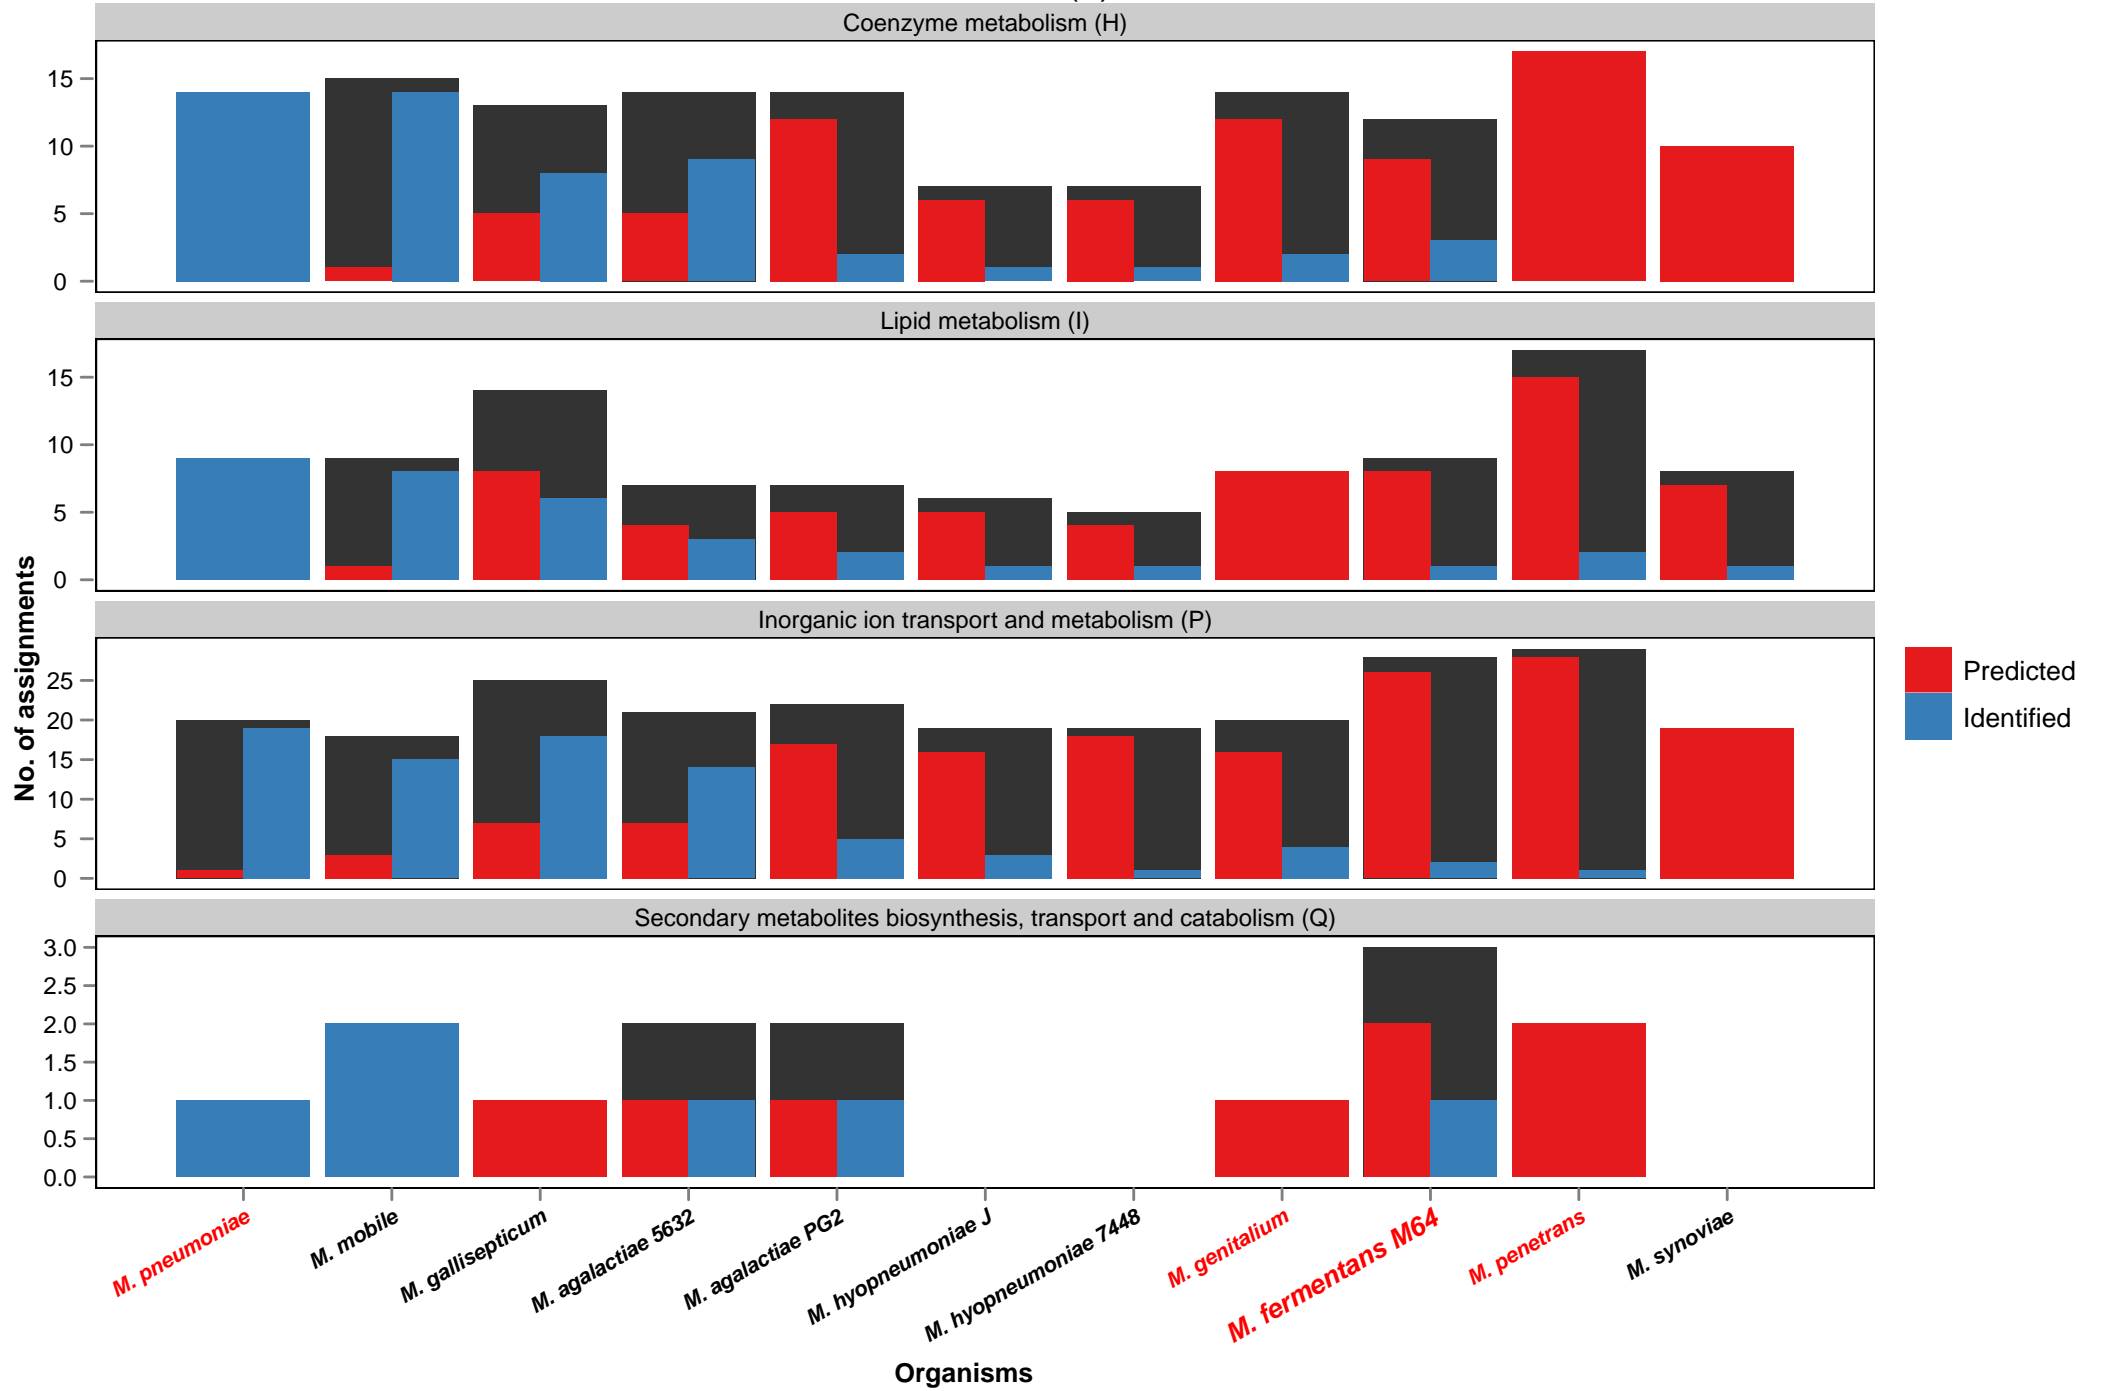

Figure 2F

OTHERS

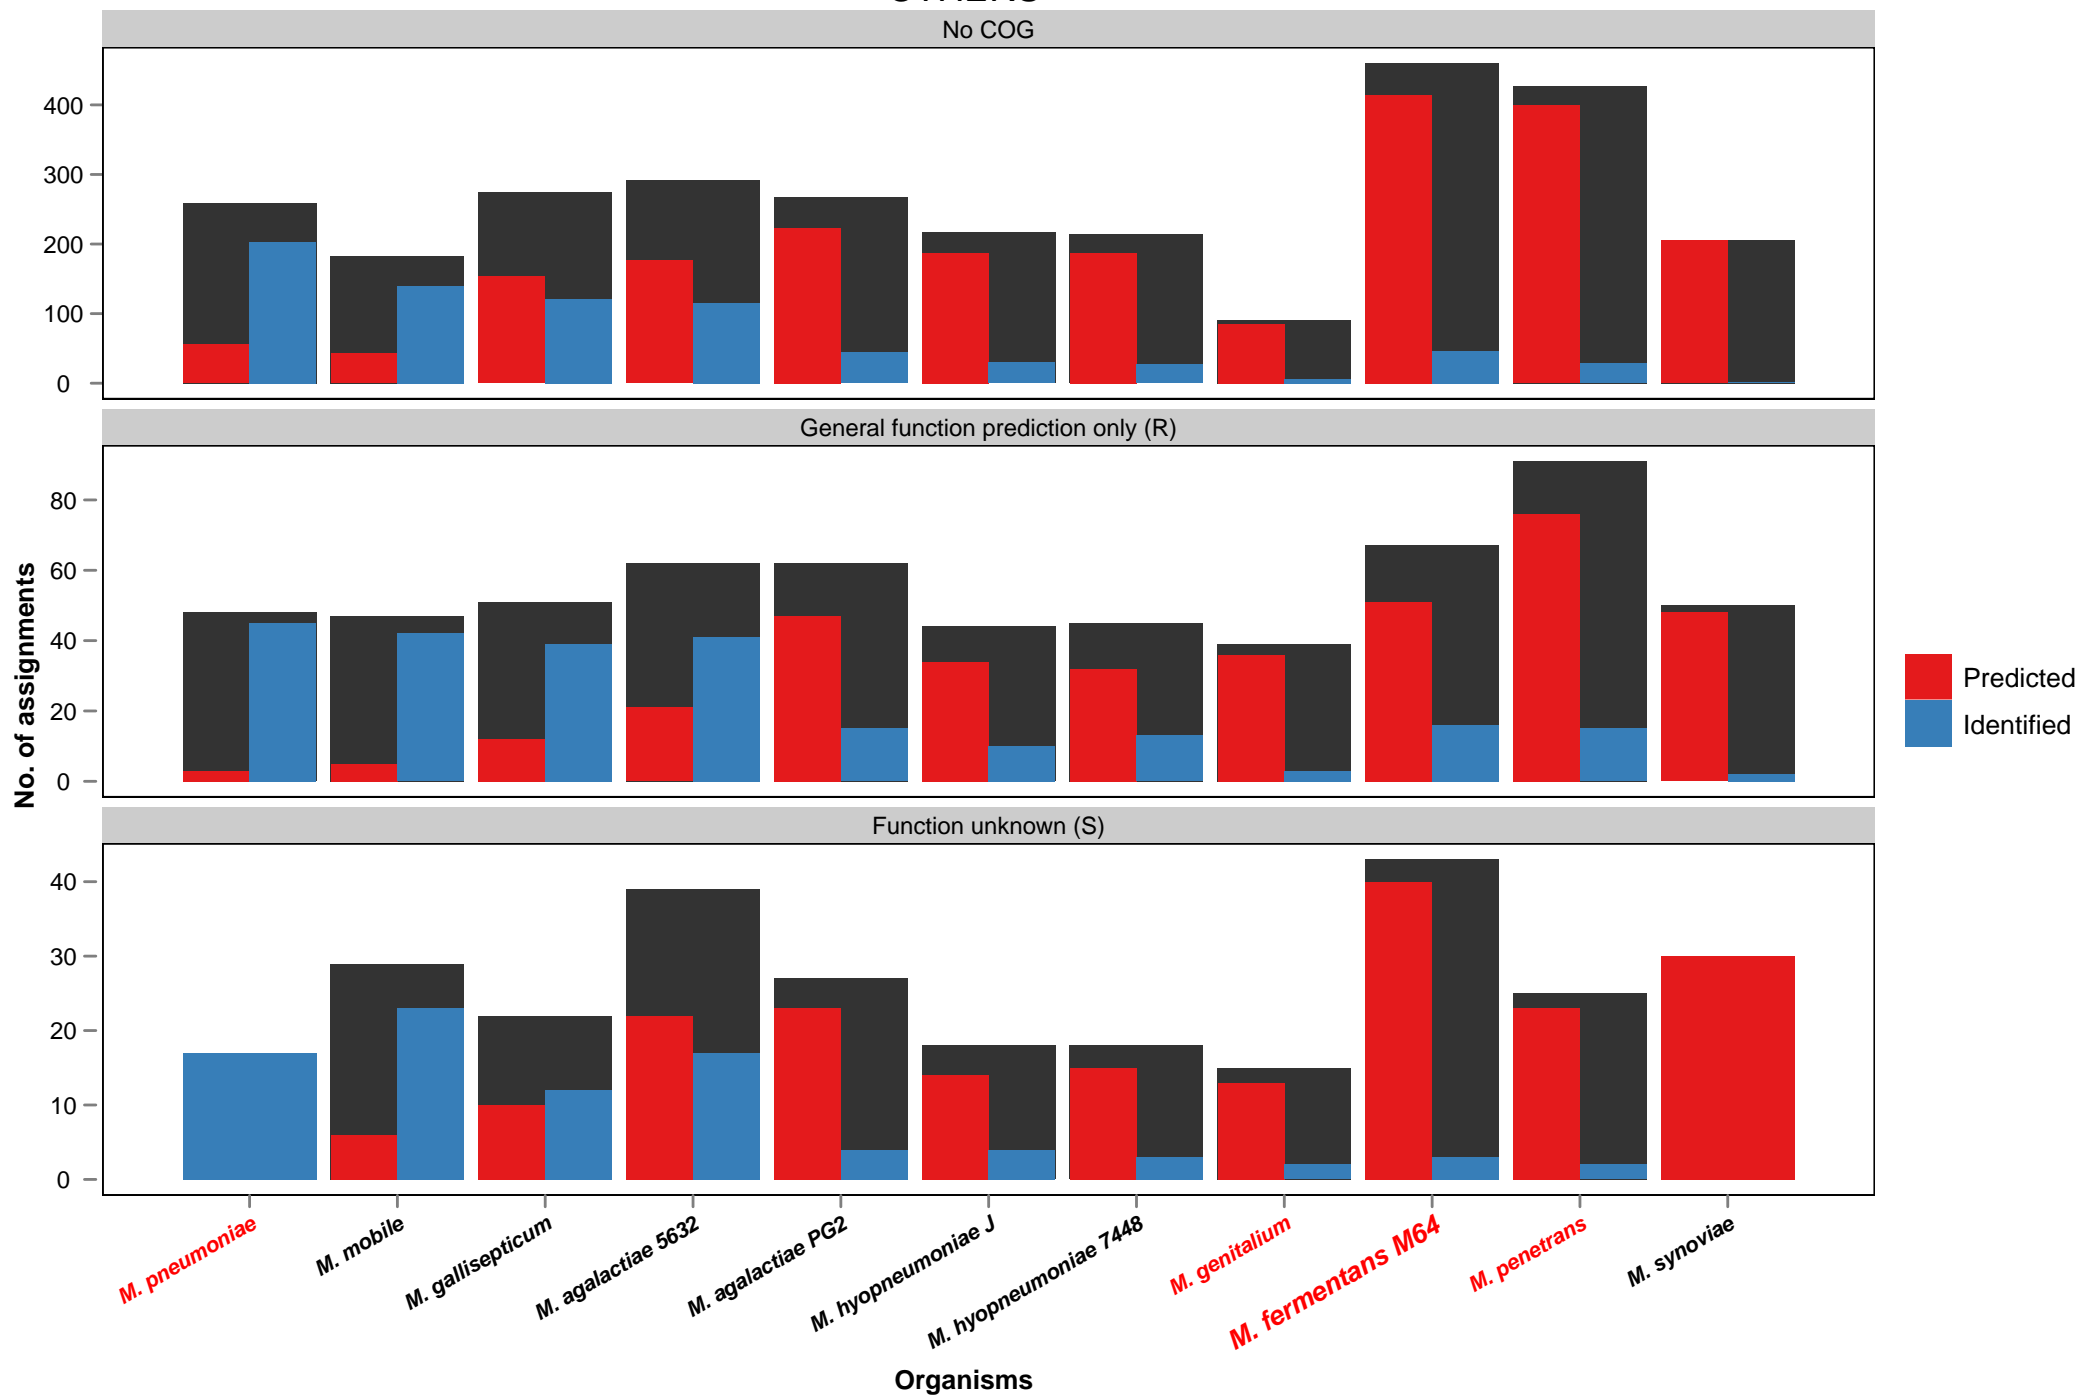

Supplement: pone.0035304.s002.pdf [file pone.0035304.s002.pdf]
